# Supplementary figures and images for: Computational Modeling of the Photon Transport, Tissue Heating, and Cytochrome C Oxidase Absorption during Transcranial Near-Infrared Stimulation
Source: MDPI journal article supplement (doi:10.3390/brainsci9080179), 2019-07-27

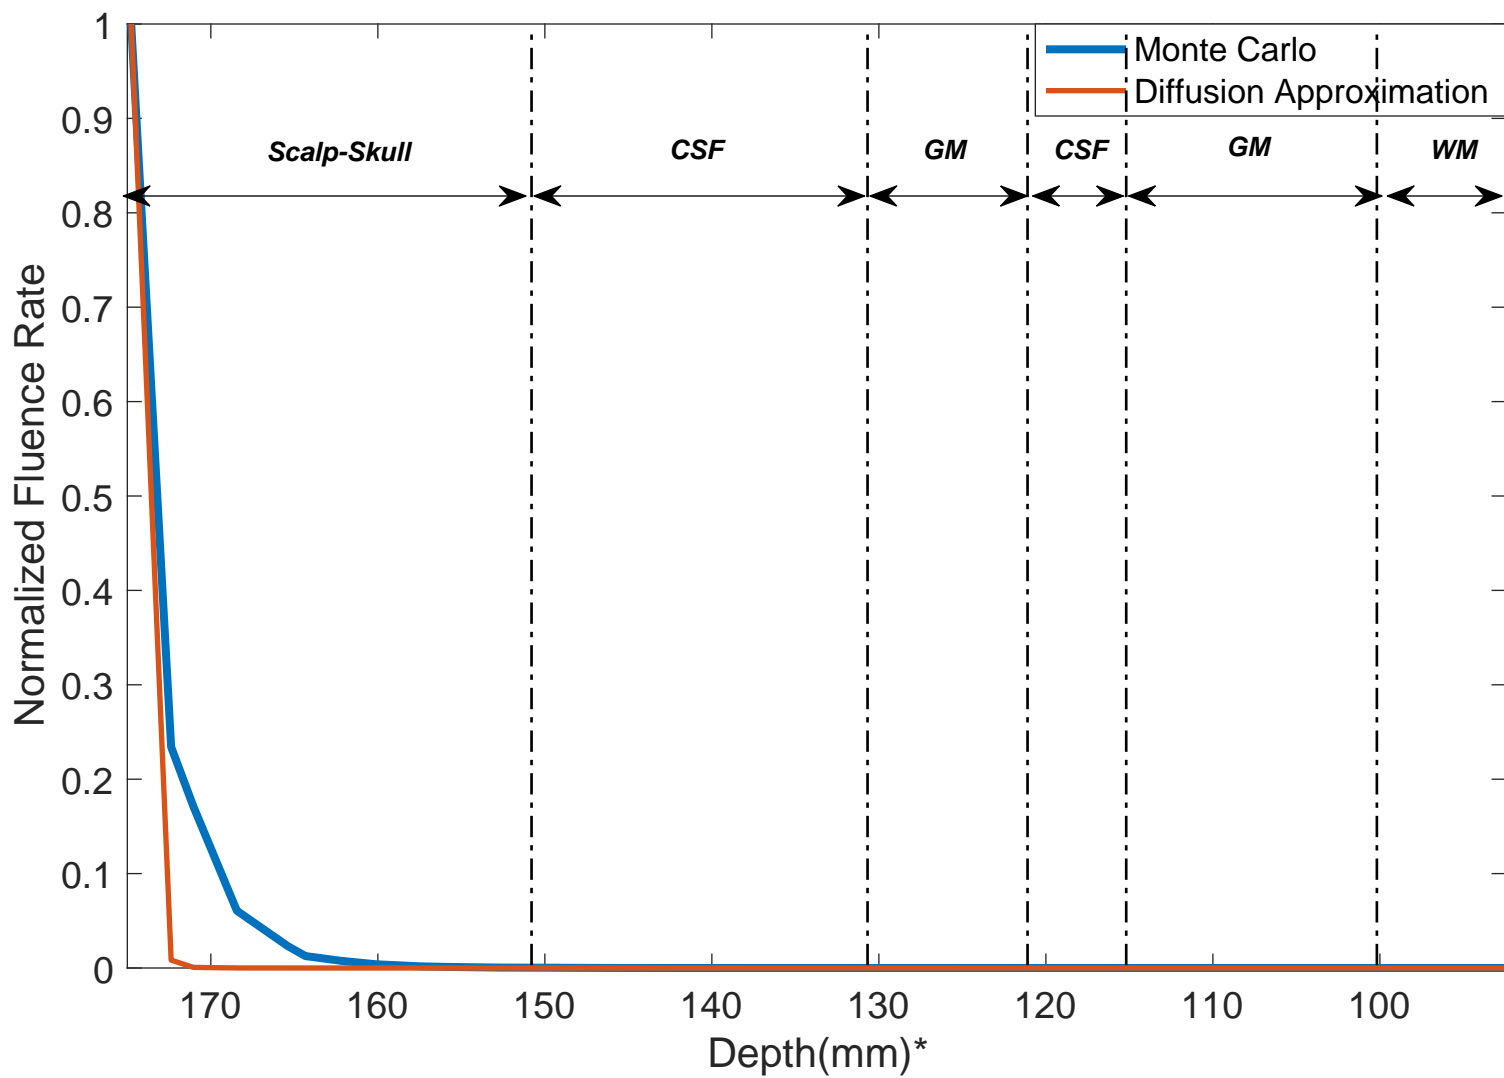

Supplement: s1 [file s1]
